# Supplementary material for: Self-assembled uracil complexes containing tautomeric uracils: an IRMPD spectroscopic and computation study of the structures of gaseous uracilnCa2+ (n = 4, 5, or 6) complexes
Source: Royal Society of Chemistry journal article supplement (doi:10.1039/c7cp07128k), 2017-11-29
Supplement: c7cp07128k1.pdf [file c7cp07128k1.pdf]

Figure S1

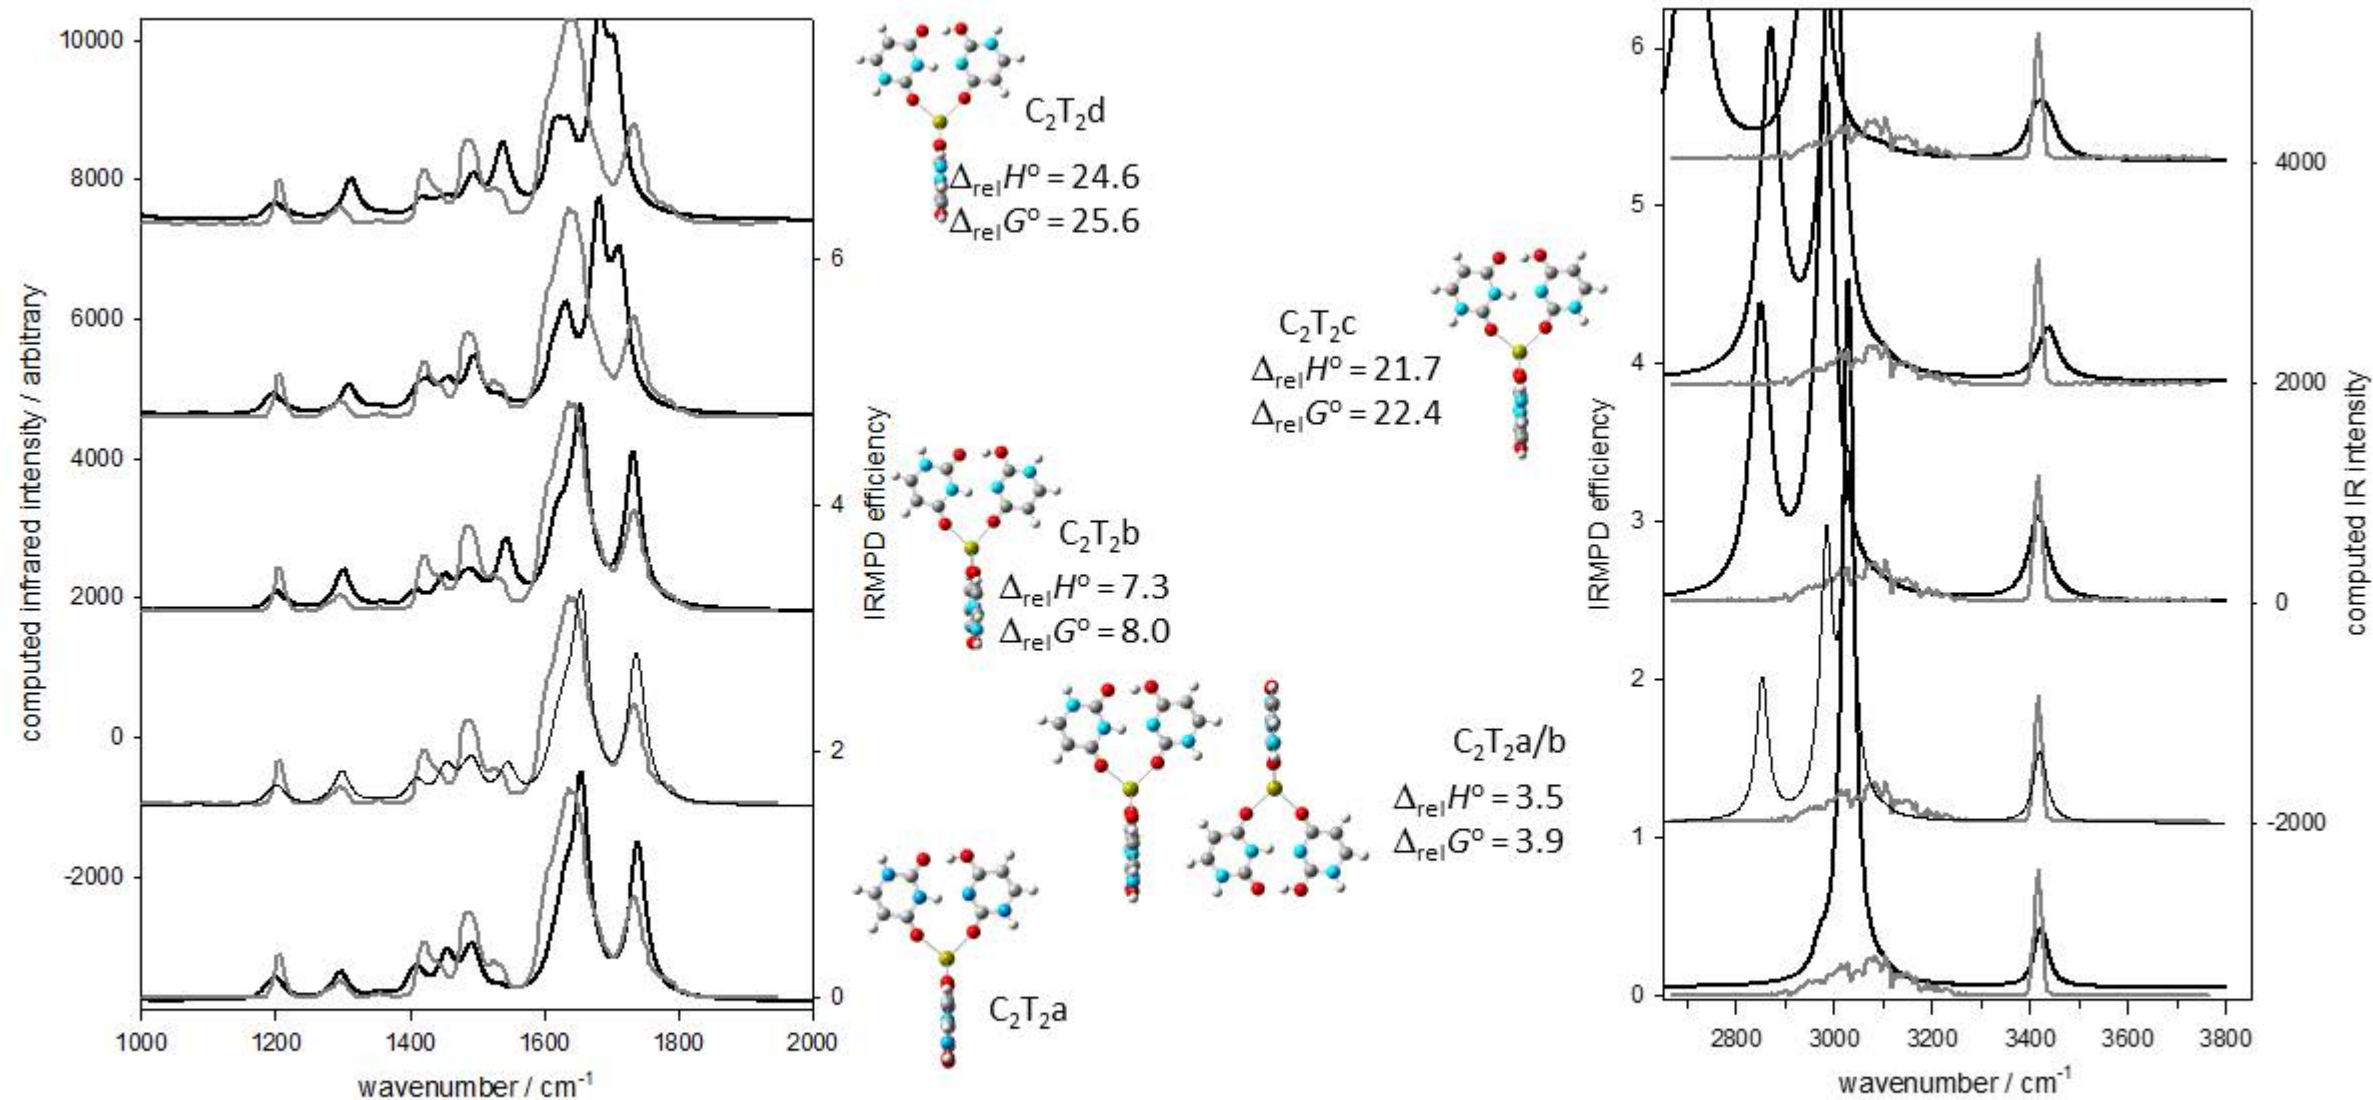

Comparison of the experimental IRMPD spectrum (grey trace) for  $U_4Ca^{2+}$  and the B3LYP/6-31+G(d,p) computed IR spectra (black traces) for five different isomers. The 298 K enthalpies and Gibbs energies relative to structure  $C_2T_2a$  are also shown (also computed using B3LYP/6-31+G(d,p)).

Figure S2

Comparison of the experimental IRMPD spectrum in the C-H/N-H/O-H stretch region (grey trace) for  $U_6Ca^{2+}$  and the B3LYP/6-31+G(d,p) computed IR spectra (black traces) for five different isomers. The 298 K enthalpies and Gibbs energies relative to structure  $C_4T_2a$  are also shown (also computed using B3LYP/6-31+G(d,p)). The experimental spectrum is complimentary to that in the fingerprint region seen in Figure 3.

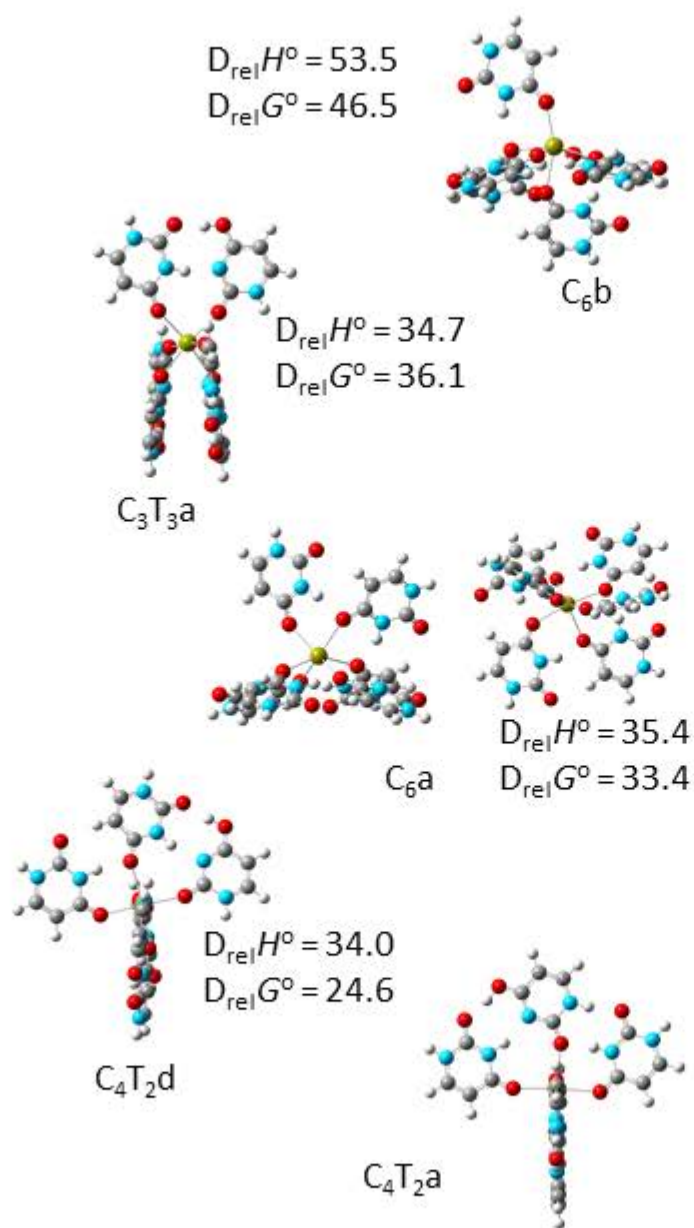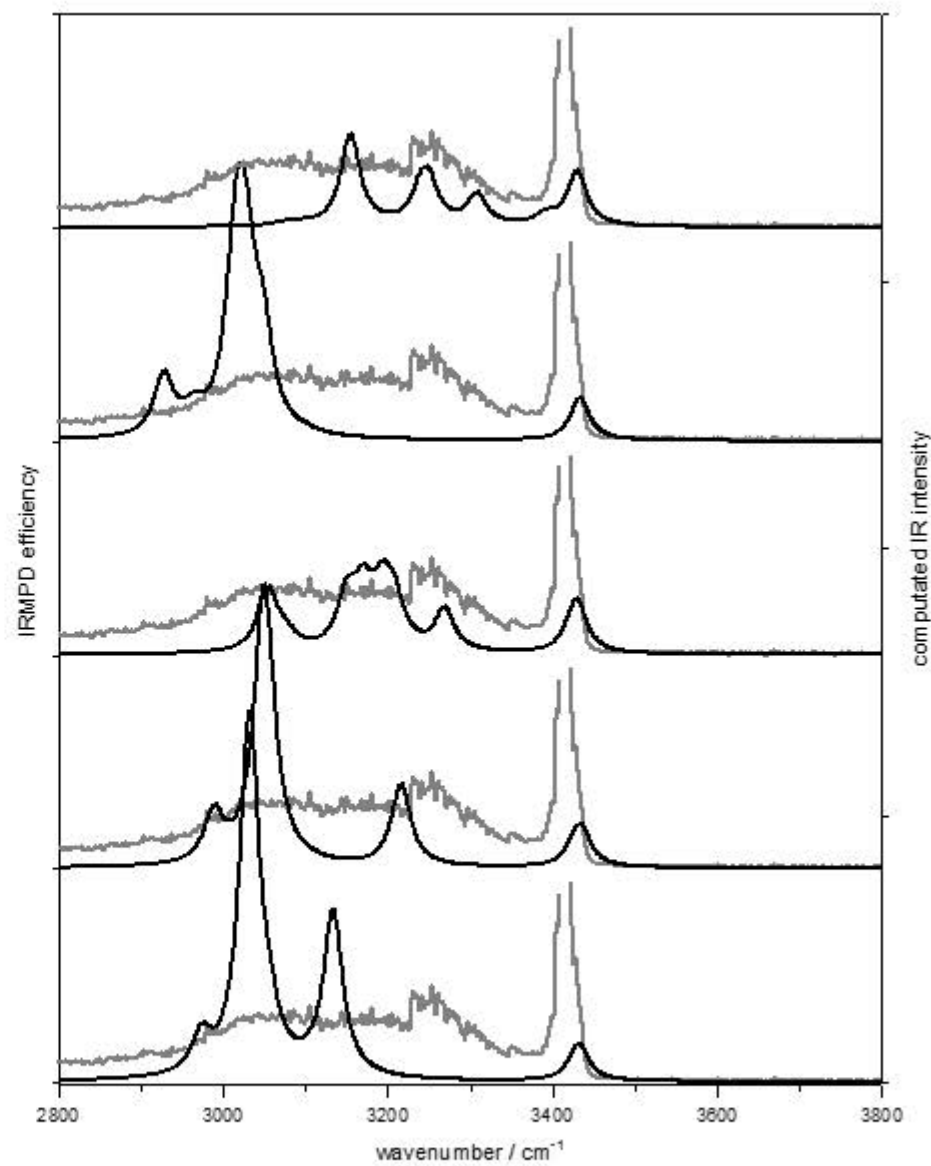

Figure S3

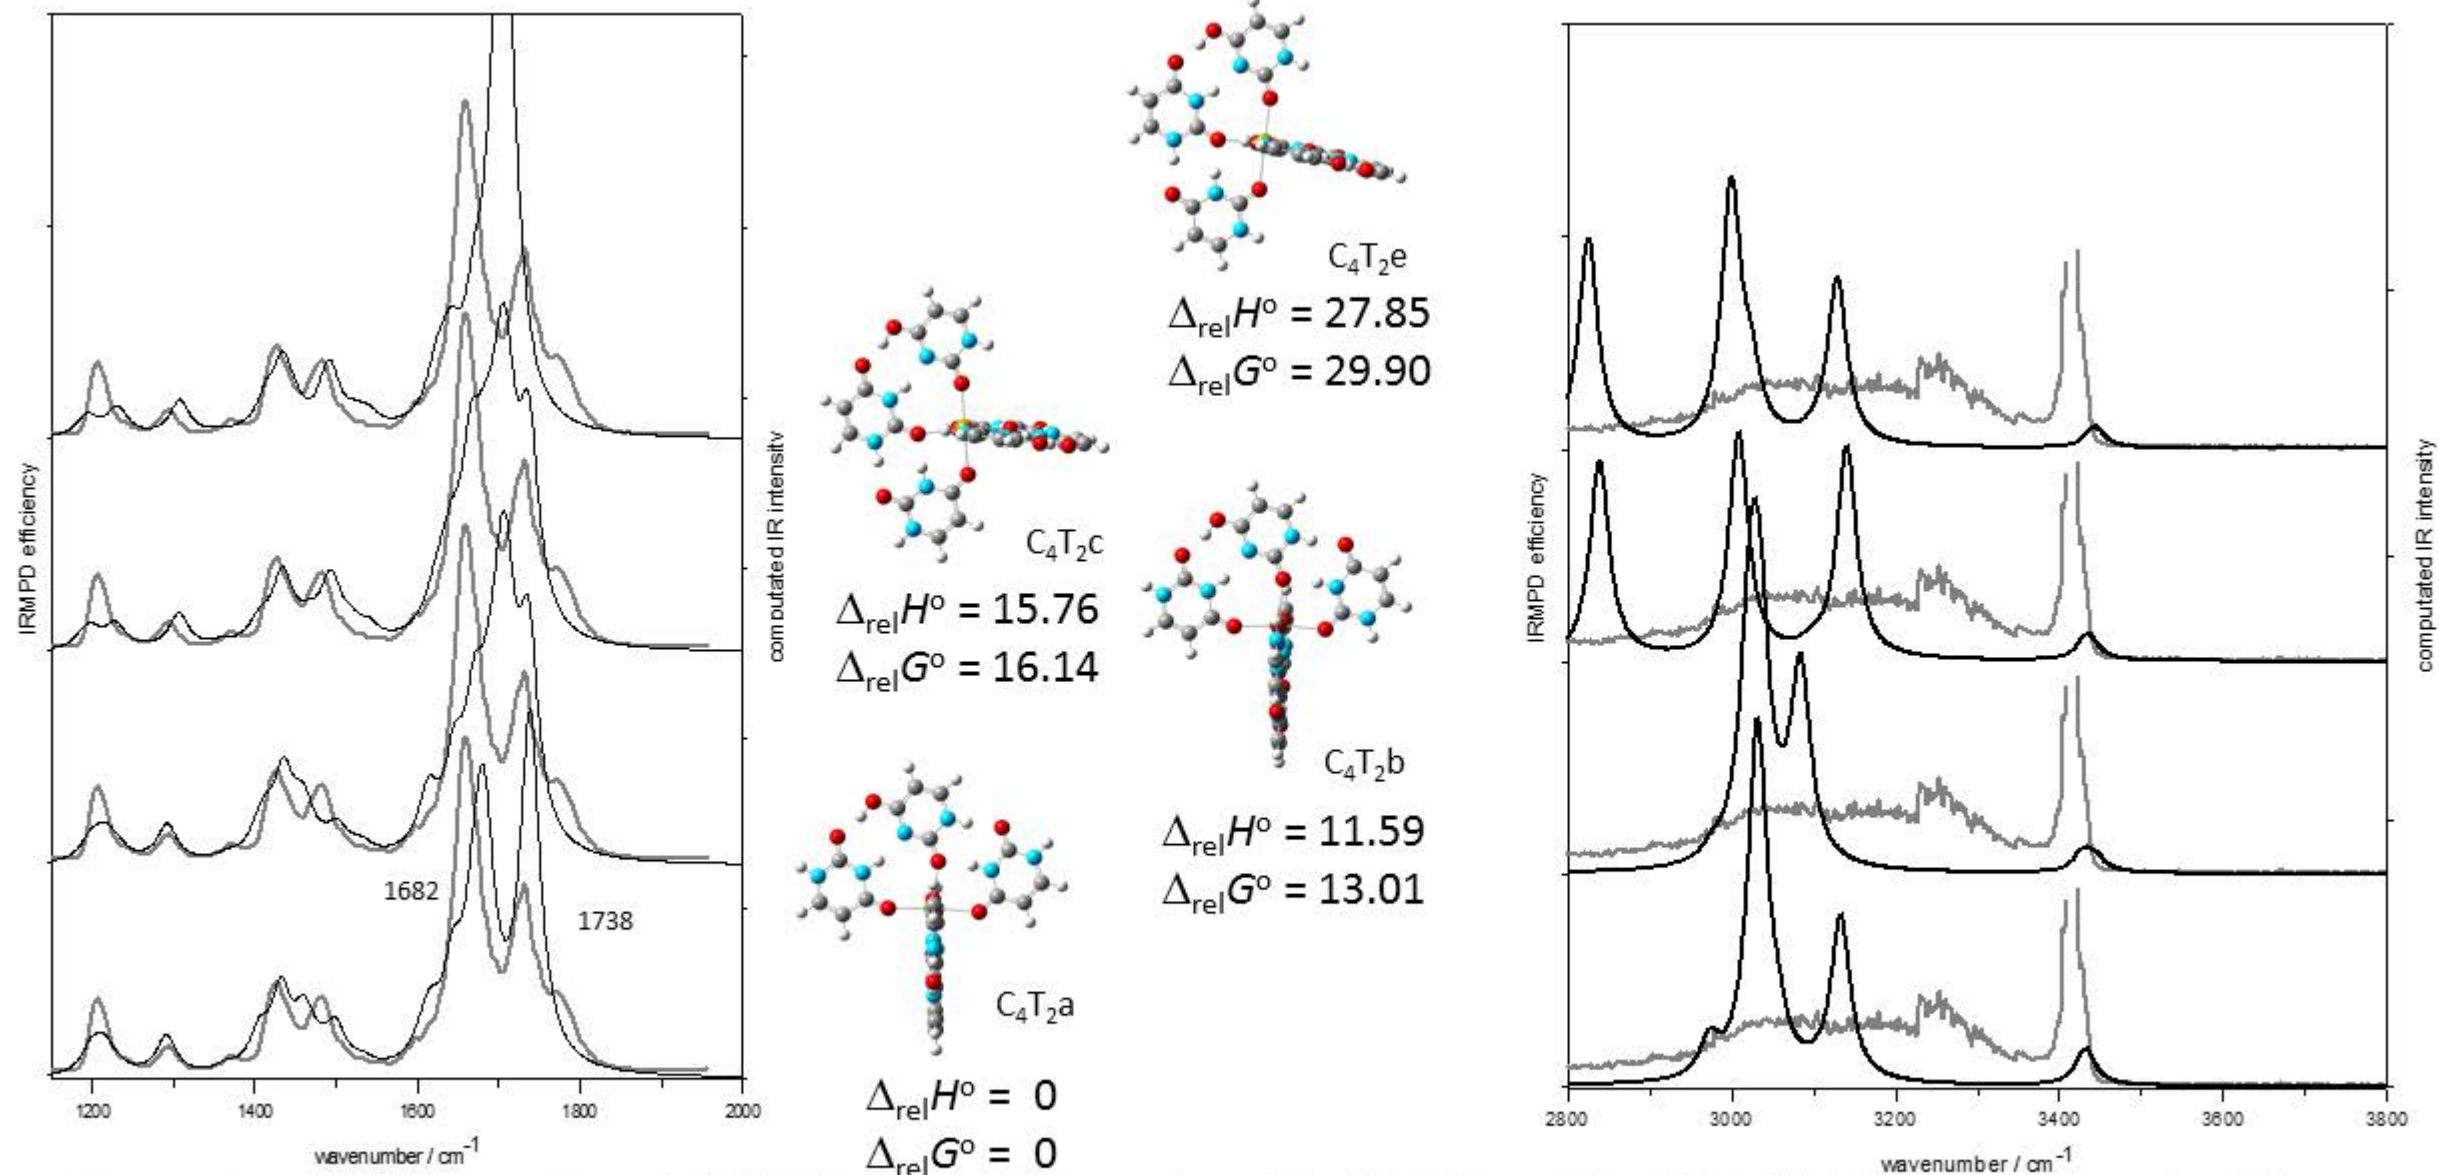

Comparison of the experimental IRMPD spectrum (grey trace) for  $\text{U}_6\text{Ca}^{2+}$  and the B3LYP/6-31+G(d,p) computed IR spectra (black traces) for four different isomers. The 298 K enthalpies and Gibbs energies relative to structure  $\text{C}_4\text{T}_2\text{a}$  are also shown (also computed using B3LYP/6-31+G(d,p)).



Figure S4

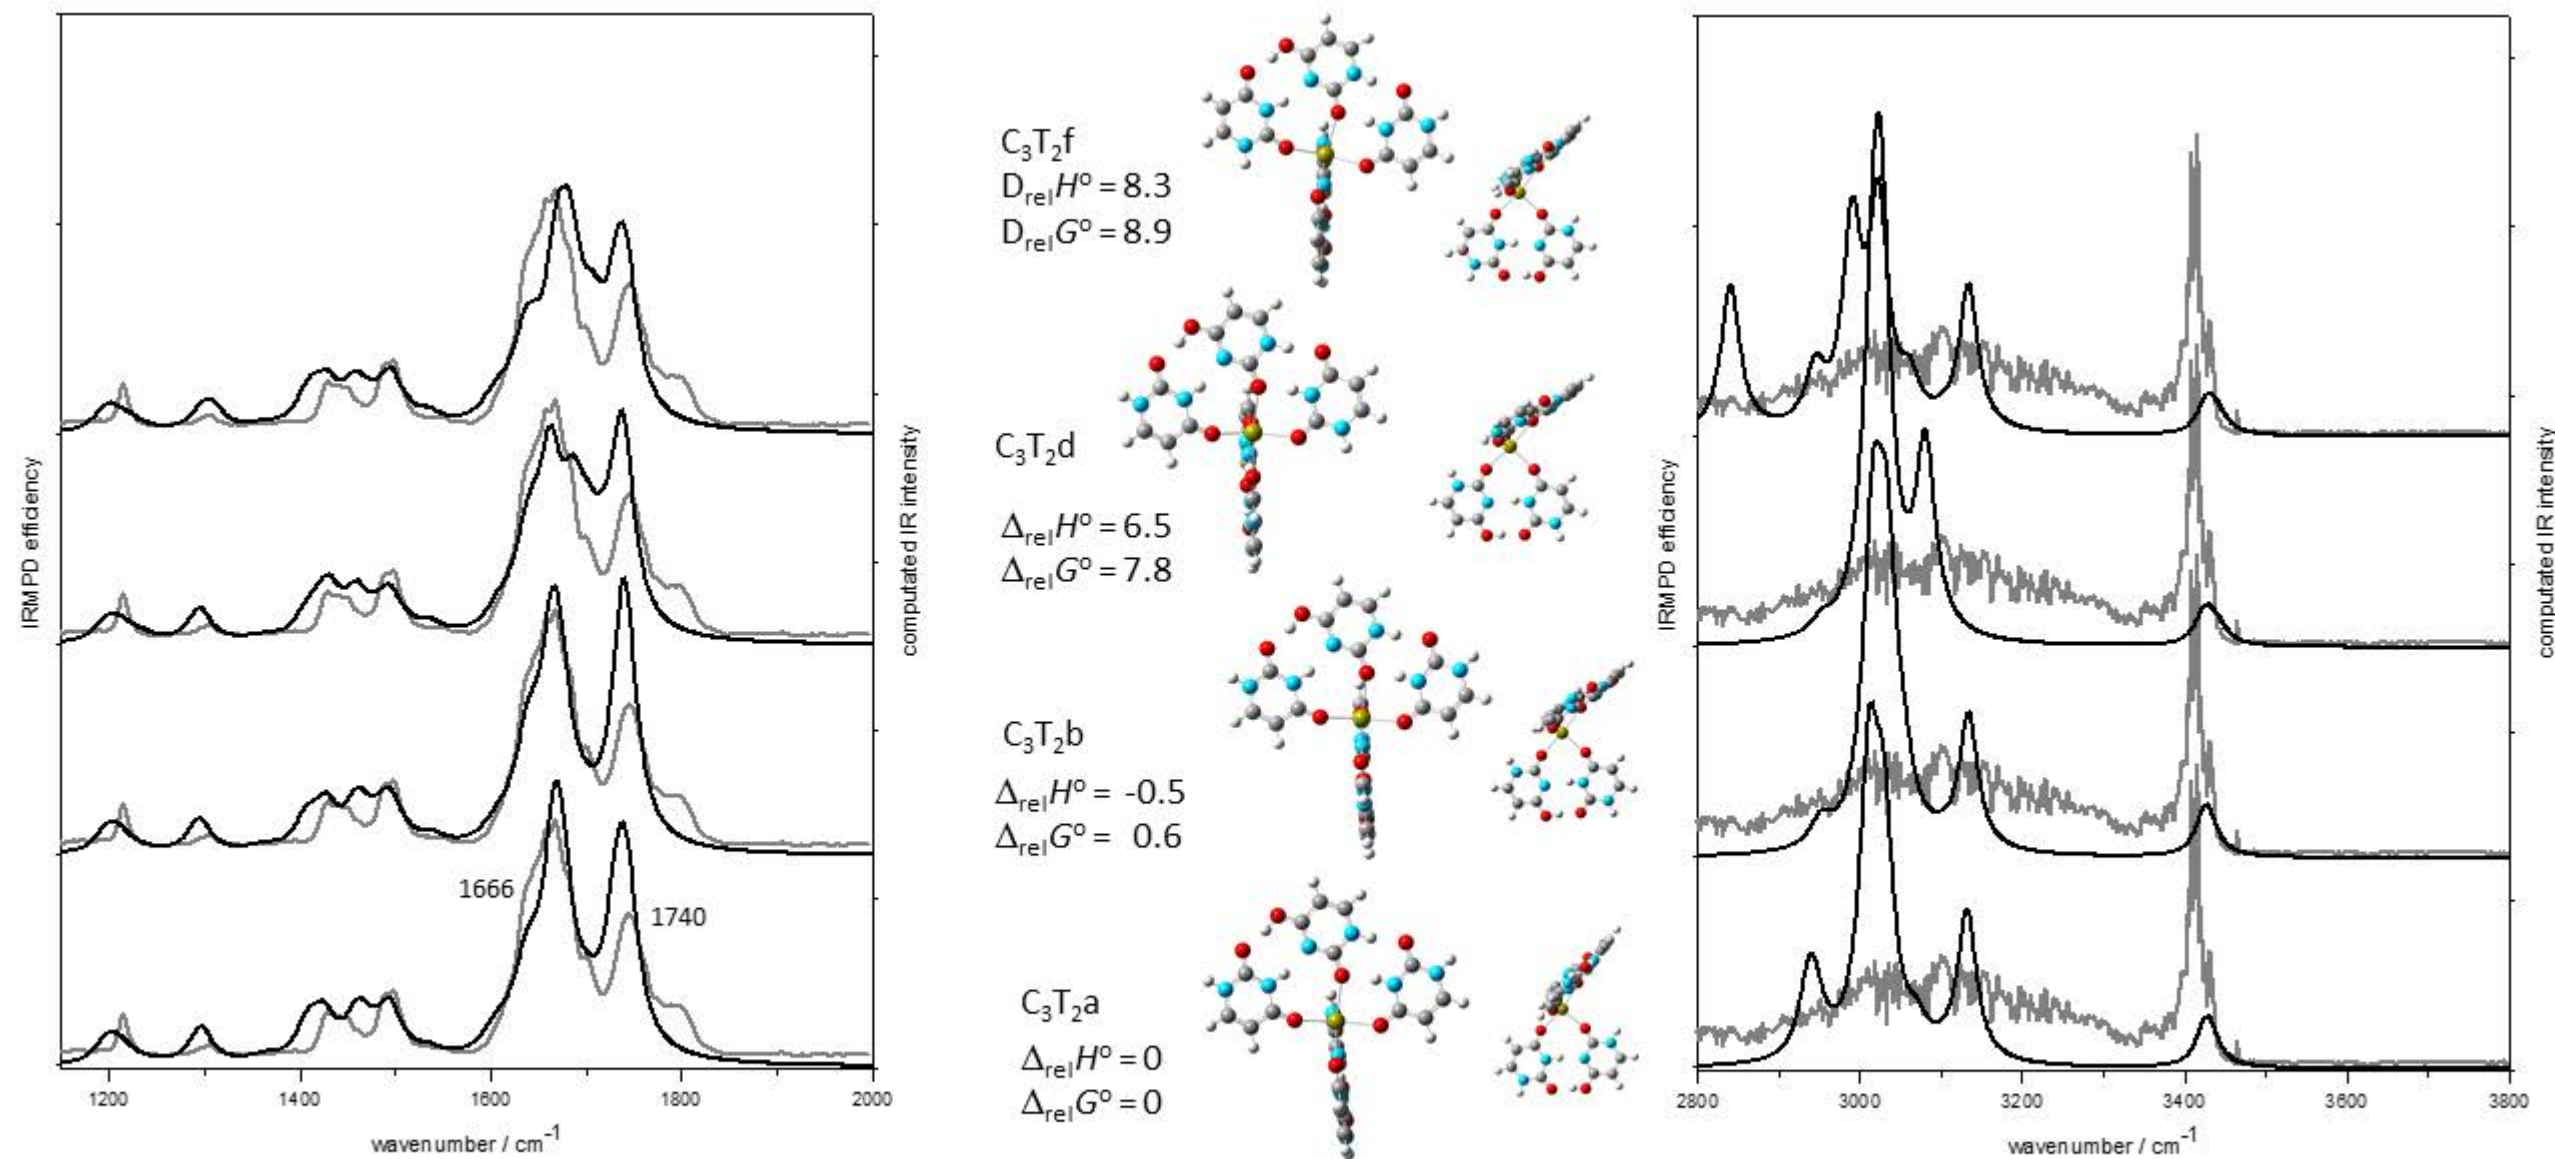

Comparison of the experimental IRMPD spectrum (grey trace) for  $U_5Ca^{2+}$  and the B3LYP/6-31+G(d,p) computed IR spectra (black traces) for four different isomers. The 298 K enthalpies and Gibbs energies relative to structure  $C_3T_2a$  are also shown (also computed using B3LYP/6-31+G(d,p)).

Figure S5

Comparison of the experimental IRMPD spectrum in the C-H/N-H/O-H stretch region (grey trace) for  $U_5Ca^{2+}$  and the B3LYP/6-31+G(d,p) computed IR spectra (black traces) for five different isomers. The 298 K enthalpies and Gibbs energies relative to structure  $C_3T_2a$  are also shown (also computed using B3LYP/6-31+G(d,p)). The experimental spectrum is complimentary to that in the fingerprint region seen in Figure 4.

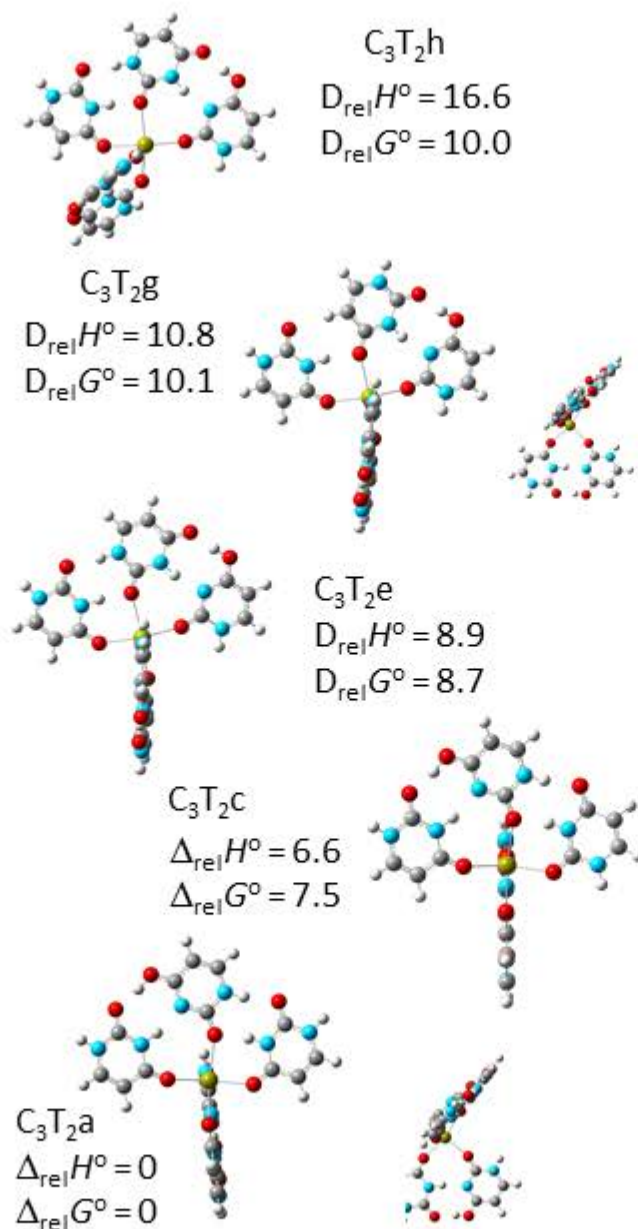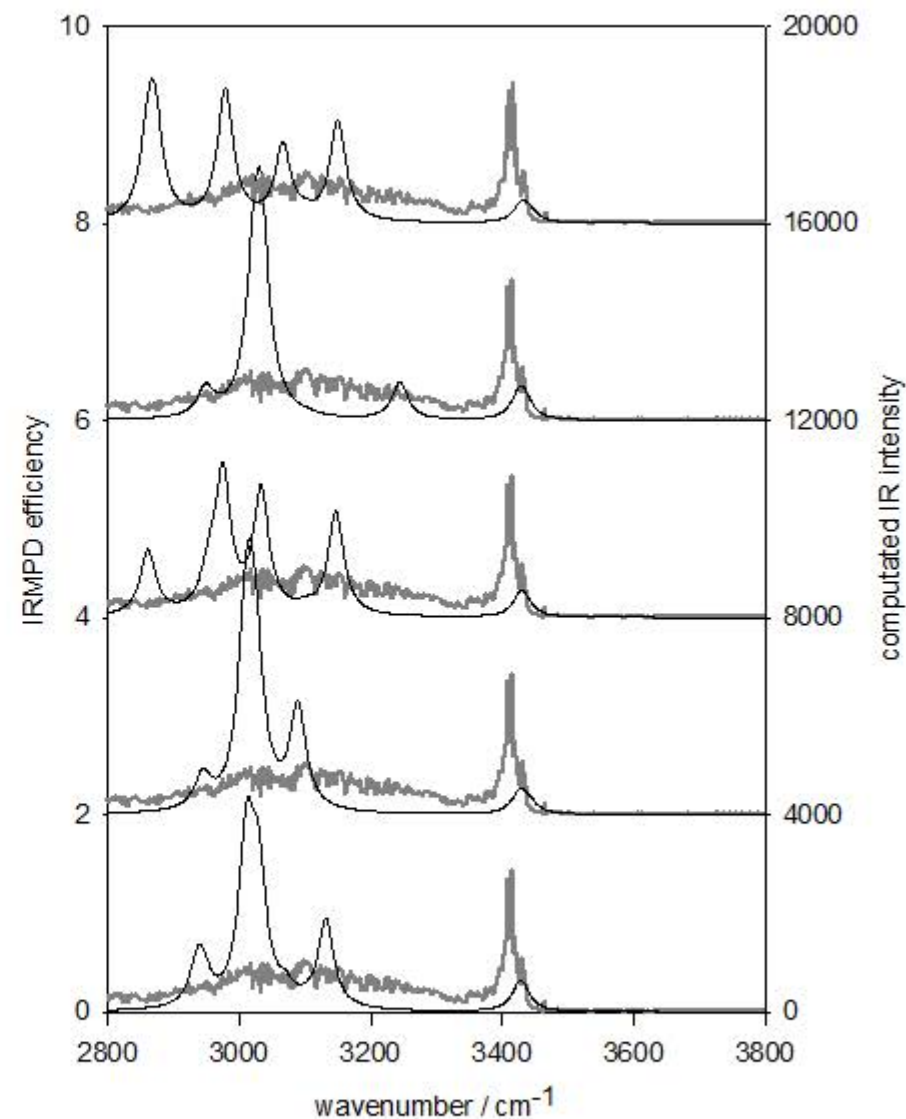

Figure S6

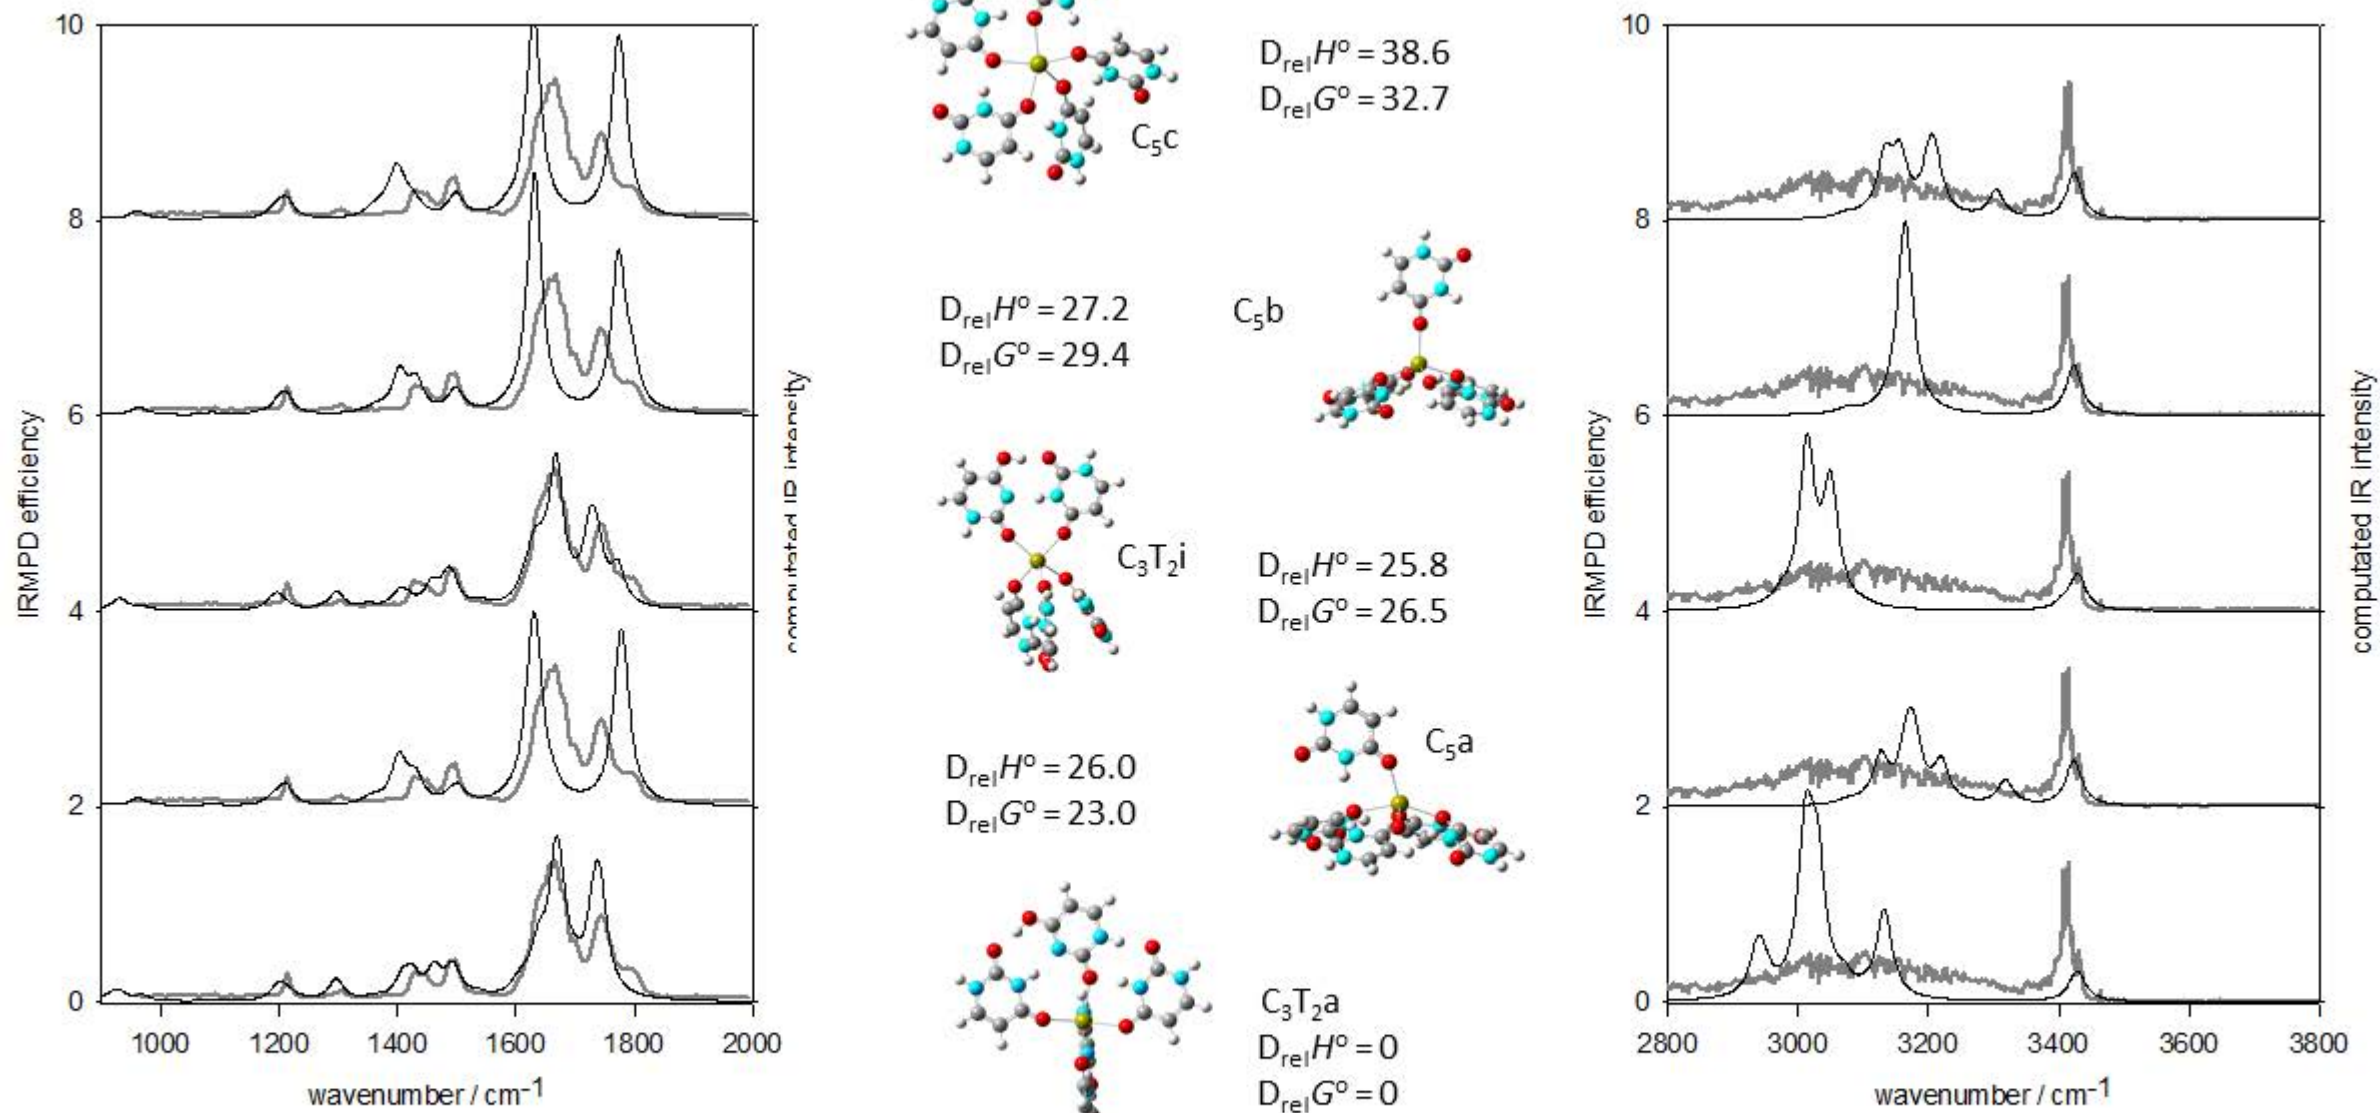

Comparison of the experimental IRMPD spectrum (grey trace) for  $U_5Ca^{2+}$  and the B3LYP/6-31+G(d,p) computed IR spectra (black traces) for five different isomers. The 298 K enthalpies and Gibbs energies relative to structure  $C_3T_2a$  are also shown (also computed using B3LYP/6-31+G(d,p)).



Figure S7

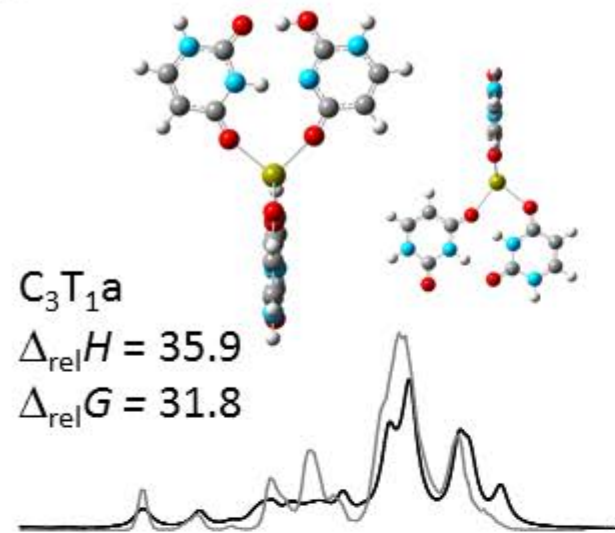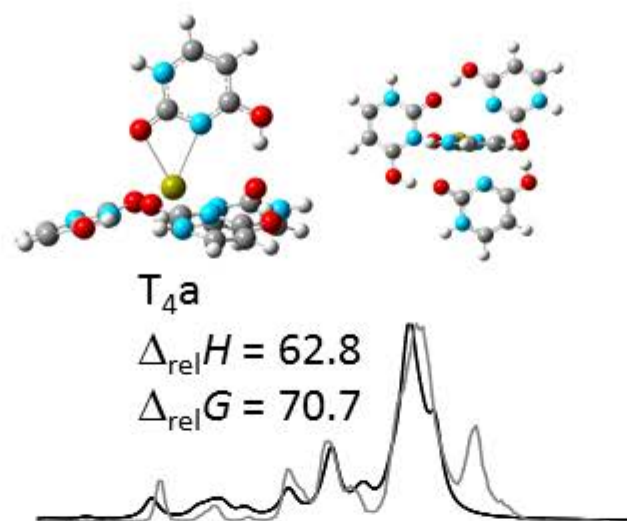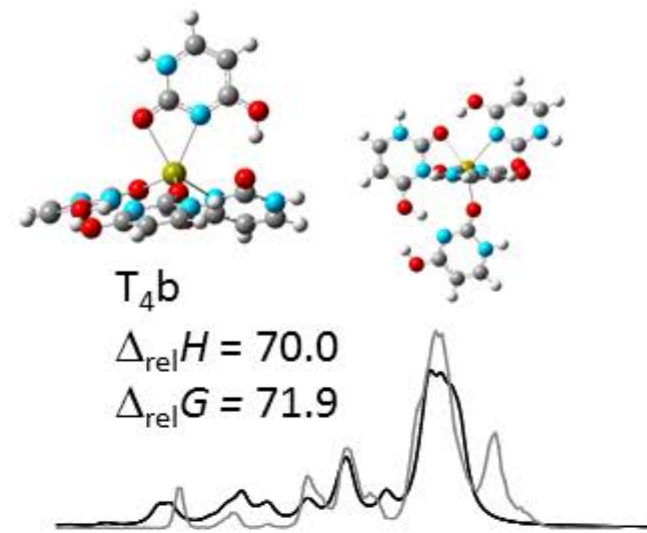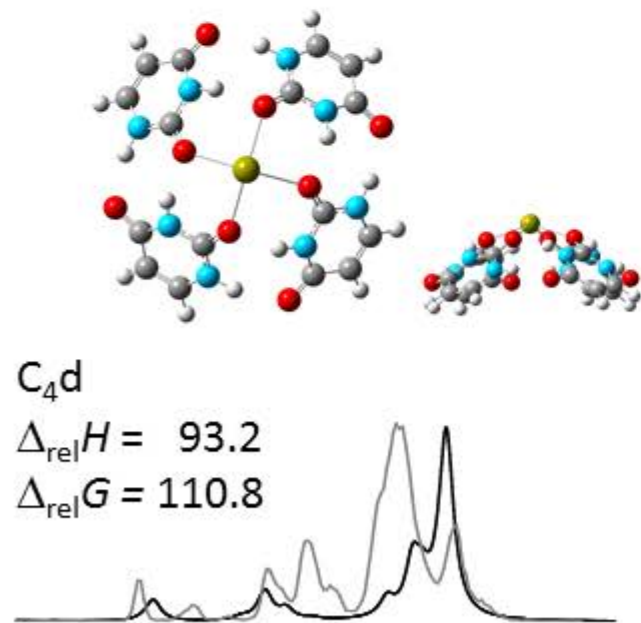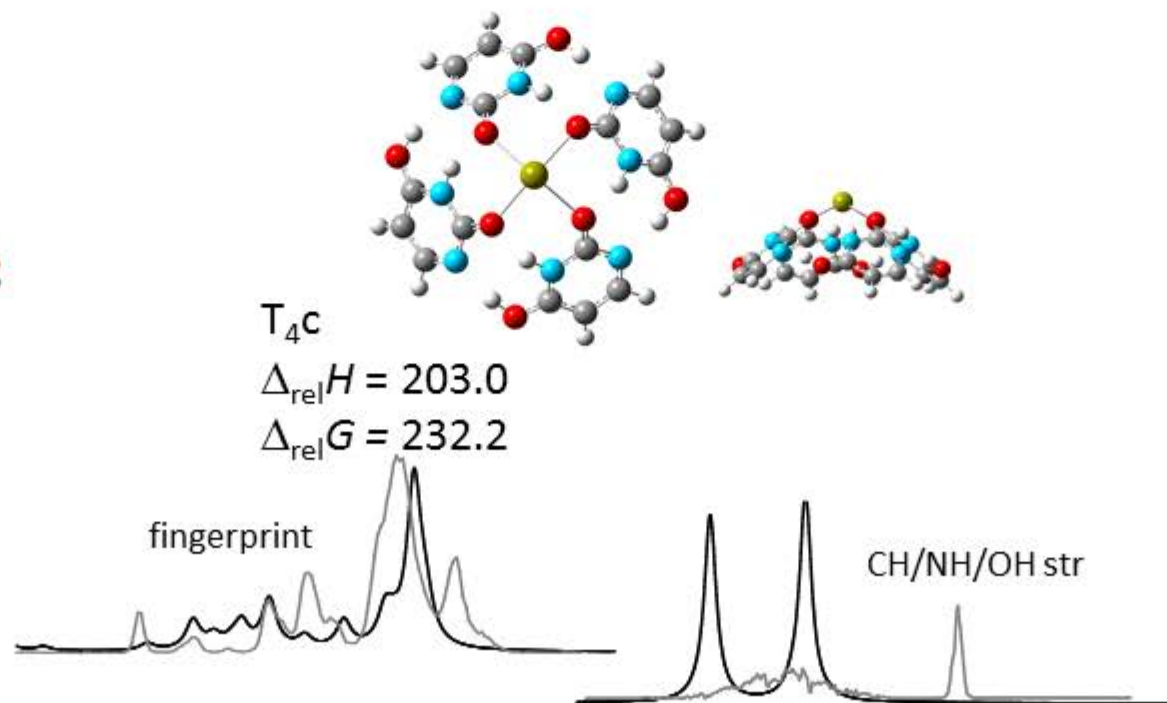

Some other higher energy  $U_4Ca^{2+}$  structures along with their energies and 298 K Gibbs energies relative to  $C_2T_2a$  and computed IR spectra (black trace) compared to the experimental IRMPD spectrum (grey trace).

Figure S8

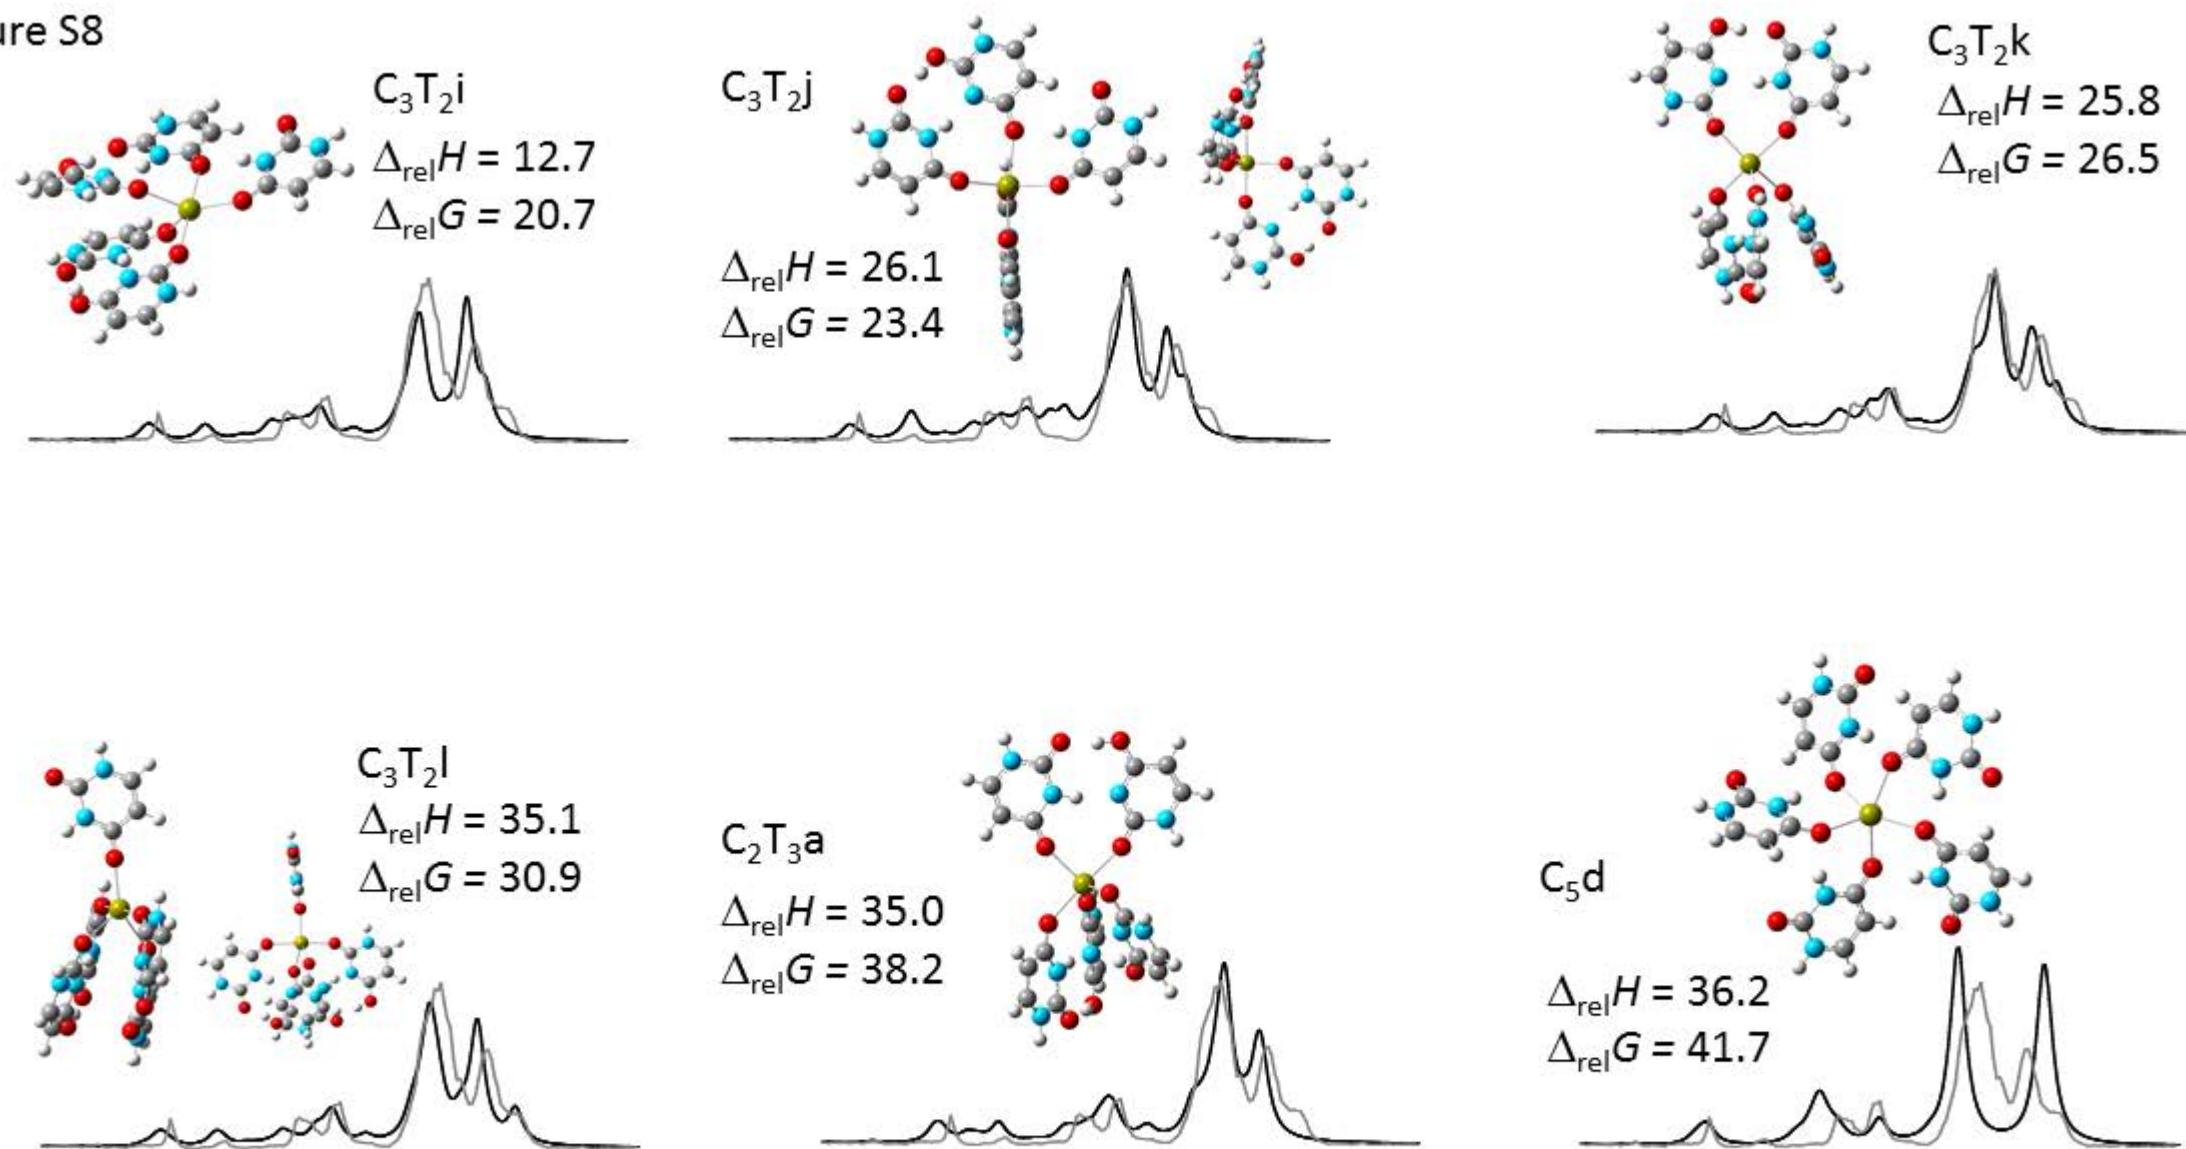

Some other higher energy  $U_5Ca^{2+}$  structures along with their energies and 298 K Gibbs energies relative to  $C_3T_2a$  and computed IR spectra (black trace) compared to the experimental IRMPD spectrum (grey trace).



Figure S8 continued

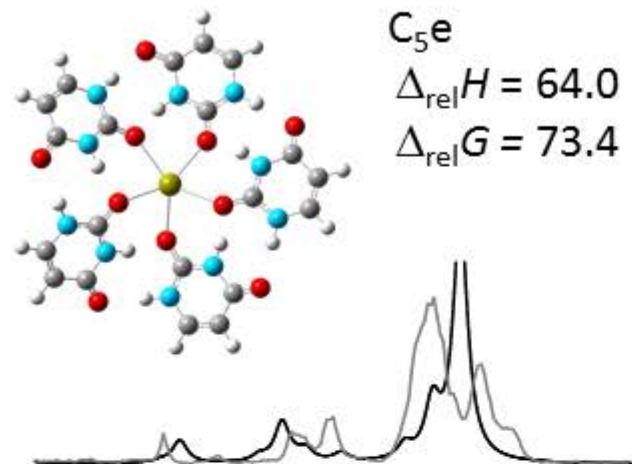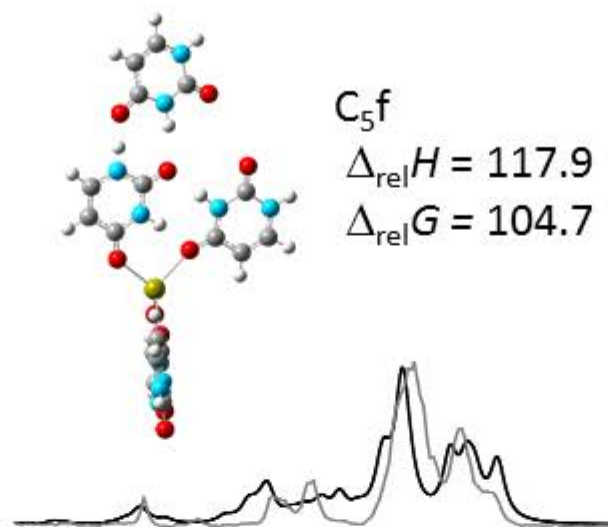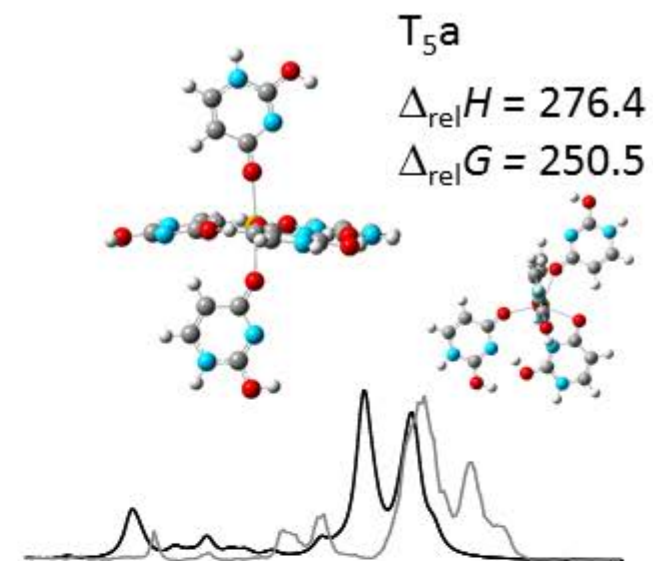

Figure S9

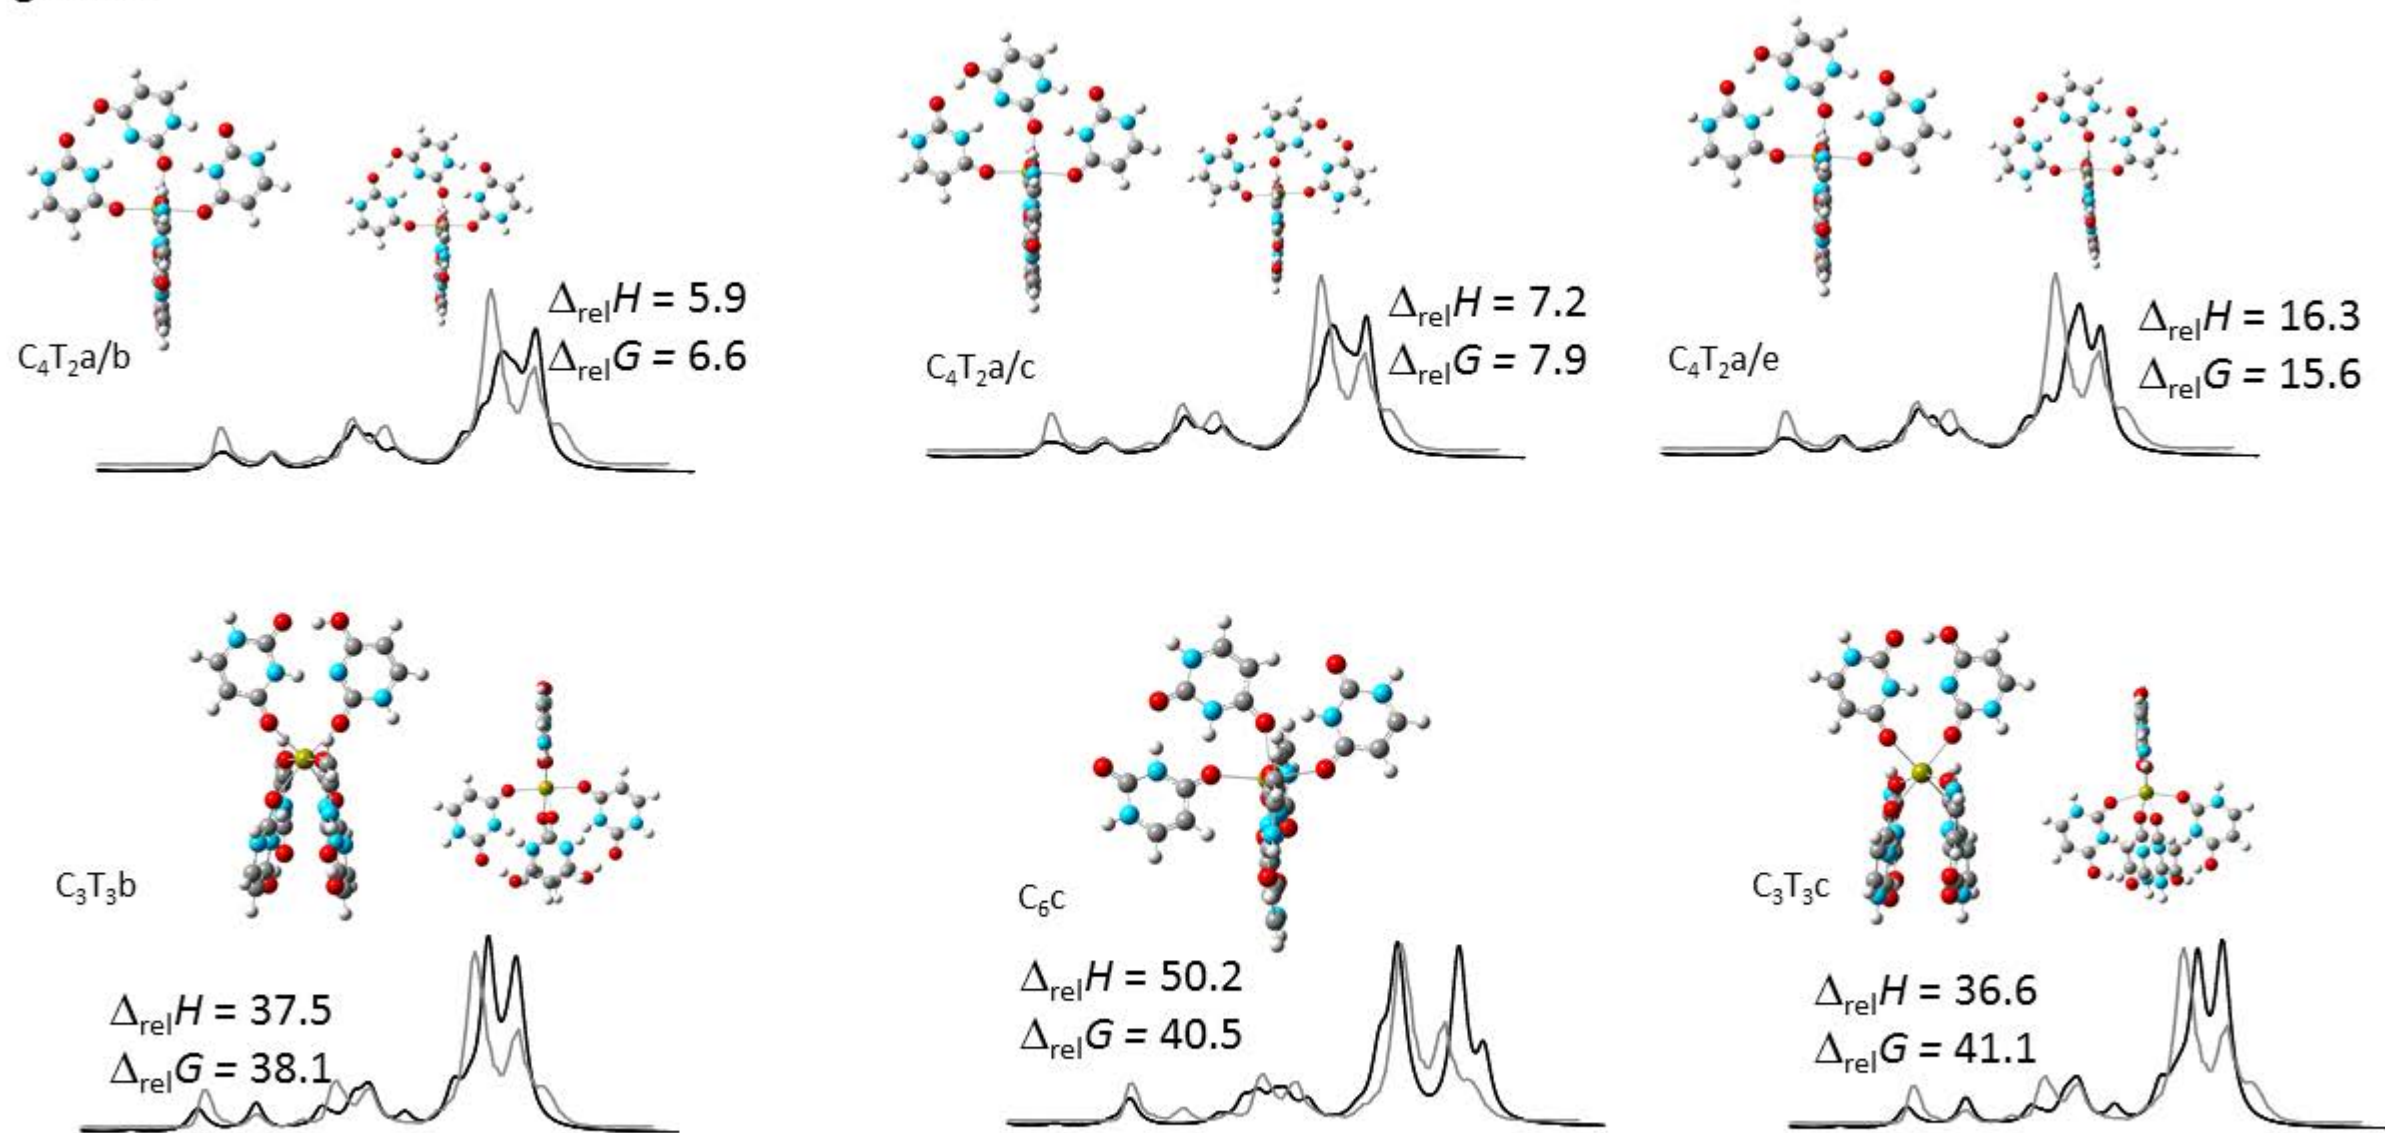

Some other higher energy  $U_6Ca^{2+}$  structures along with their energies and 298 K Gibbs energies relative to  $C_4T_2a$  and computed IR spectra (black trace) compared to the experimental IRMPD spectrum (grey trace).

Figure S9 continued

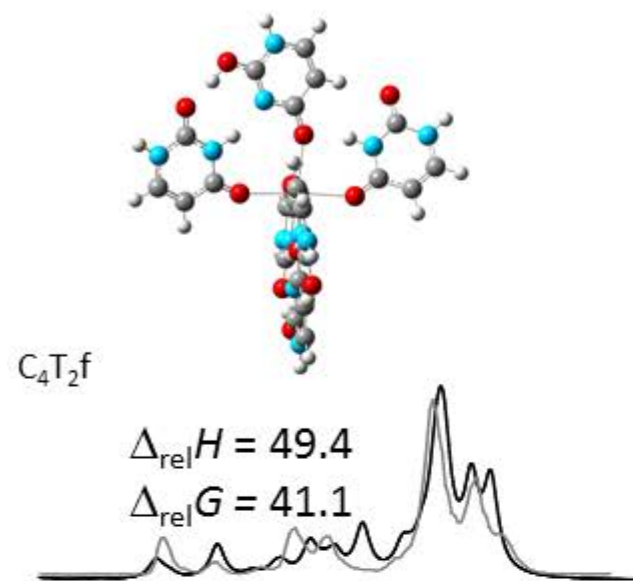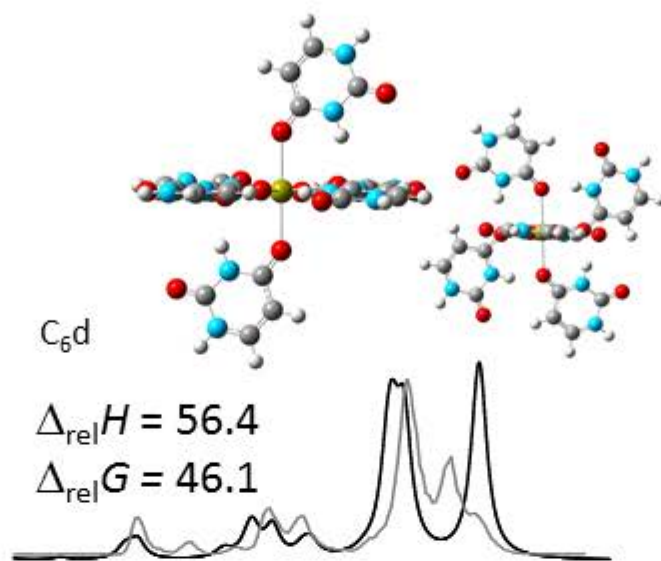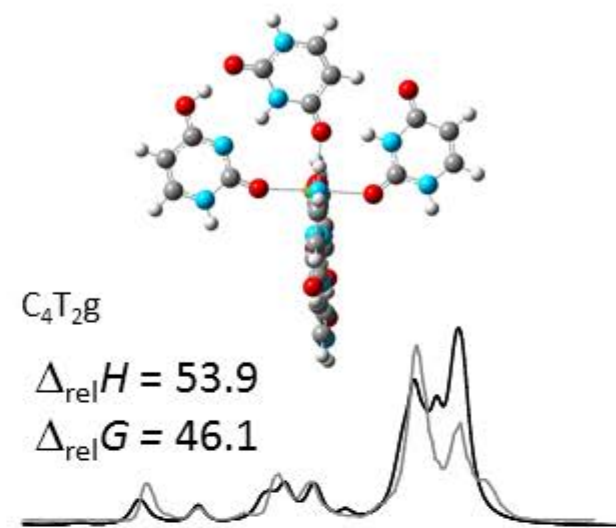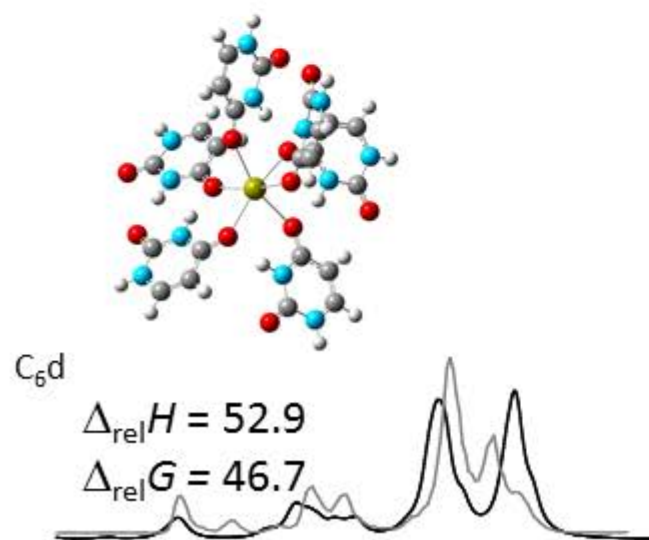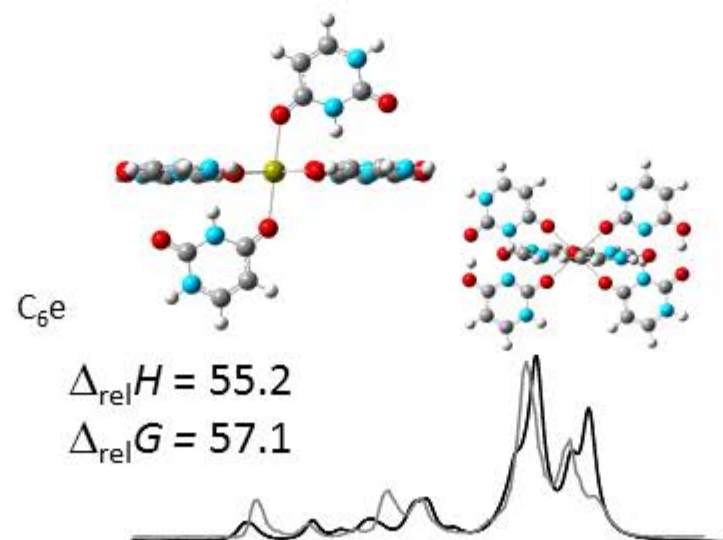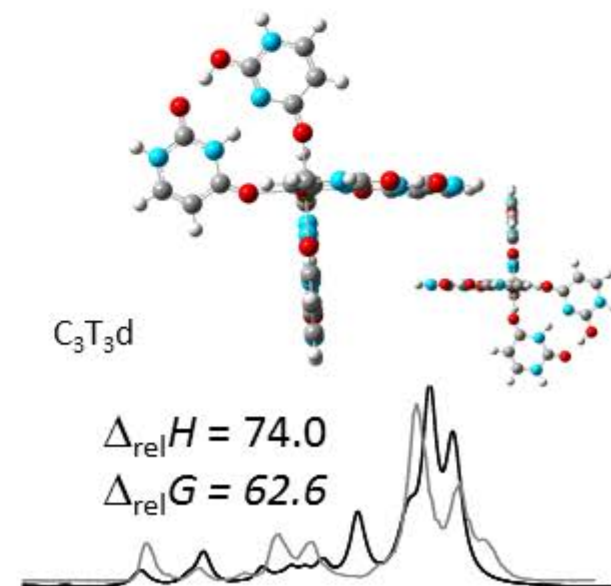



Figure S9 continued

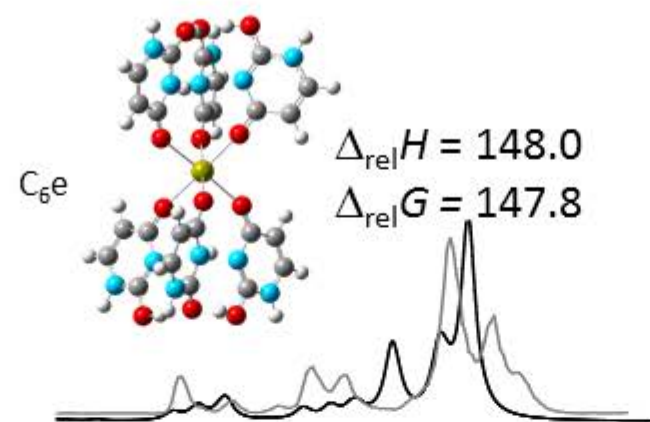

Figure S10. Mass spectra following  $3420\text{ cm}^{-1}$  irradiation of isolated A)  $\text{U}_4\text{Ca}^{2+}$ , B)  $\text{U}_5\text{Ca}^{2+}$ , and C)  $\text{U}_6\text{Ca}^{2+}$ .

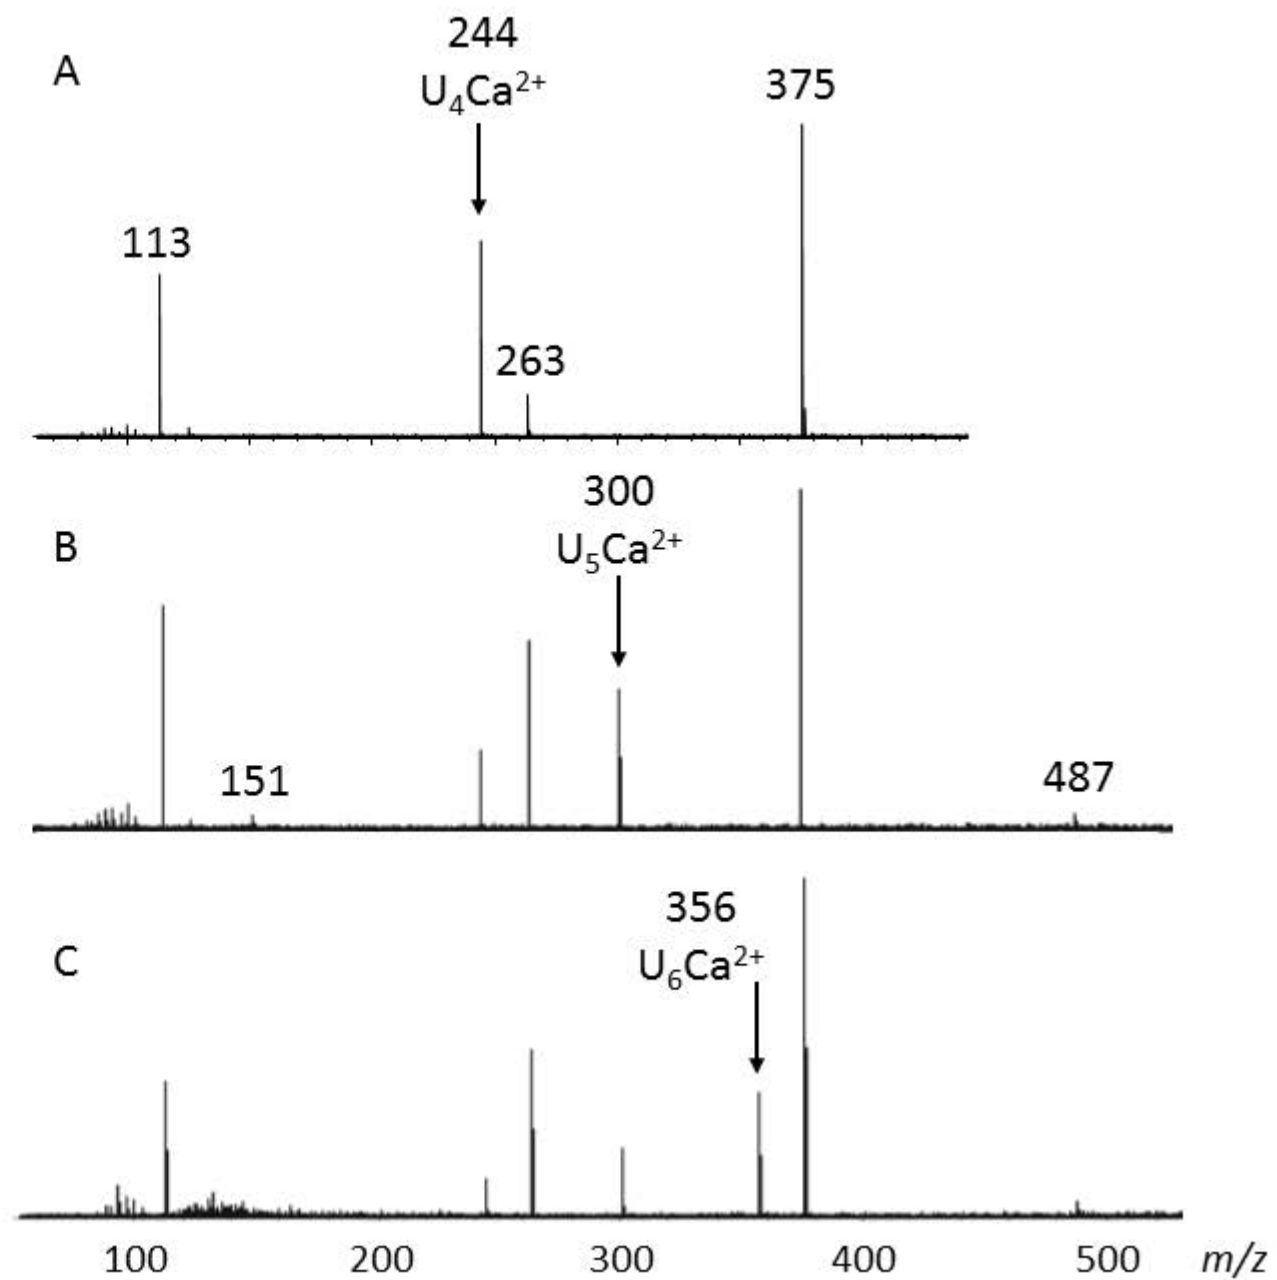

Table S1: Comparison of basis set on the 298 K energetics (top relative enthalpies, bottom relative Gibbs energies) in  $\text{kJ mol}^{-1}$  of some  $\text{U}_5\text{Ca}^{2+}$  structures.

| Structure                      | B3LYPD3/6-31+G(d,p) | B3LYPD3/6-311+G(3df,3pd) |
|--------------------------------|---------------------|--------------------------|
| $\text{C}_3\text{T}_2\text{a}$ | 0.0                 | 0.0                      |
|                                | 0.0                 | 0.0                      |
| $\text{C}_3\text{T}_2\text{b}$ | -0.5                | -0.4                     |
|                                | +0.6                | +0.6                     |
| $\text{C}_3\text{T}_2\text{d}$ | 6.5                 | 7.0                      |
|                                | 7.8                 | 8.3                      |
| $\text{C}_3\text{T}_2\text{c}$ | 6.6                 | 7.1                      |
|                                | 7.5                 | 8.0                      |
| $\text{C}_3\text{T}_2\text{f}$ | 8.3                 | 8.6                      |
|                                | 8.9                 | 9.3                      |
| $\text{C}_3\text{T}_2\text{e}$ | 8.9                 | 8.8                      |
|                                | 8.7                 | 8.6                      |

Table S2: Comparison of basis set on the 298 K energetics (top relative enthalpies, bottom relative Gibbs energies) in  $\text{kJ mol}^{-1}$  of some  $\text{U}_6\text{Ca}^{2+}$  structures.

| Structure                      | B3LYPD3/6-31+G(d,p) | B3LYPD3/6-311+G(3df,3pd) |
|--------------------------------|---------------------|--------------------------|
| $\text{T}_4\text{C}_2\text{a}$ | 0.0                 | 0.0                      |
|                                | 0.0                 | 0.0                      |
| $\text{T}_4\text{C}_2\text{b}$ | 11.6                | 12.2                     |
|                                | 13.1                | 13.7                     |
| $\text{T}_4\text{C}_2\text{c}$ | 15.8                | 15.7                     |
|                                | 16.1                | 16.1                     |
| $\text{T}_4\text{C}_2\text{d}$ | 34.0                | 32.7                     |
|                                | 24.6                | 23.3                     |
| $\text{T}_4\text{C}_2\text{e}$ | 27.9                | 28.7                     |
|                                | 29.9                | 30.8                     |
| $\text{T}_4\text{C}_2\text{f}$ | 34.7                | 31.9                     |
|                                | 36.1                | 33.2                     |
